# Supplementary material for: The role of hydrodynamics, matrix and sampling duration in passive sampling of polar compounds with Empore™ SDB-RPS disks
Source: Royal Society of Chemistry journal article supplement (doi:10.1039/b710790k), 2008-01-01
Supplement: b710790k.pdf [file b710790k.pdf]

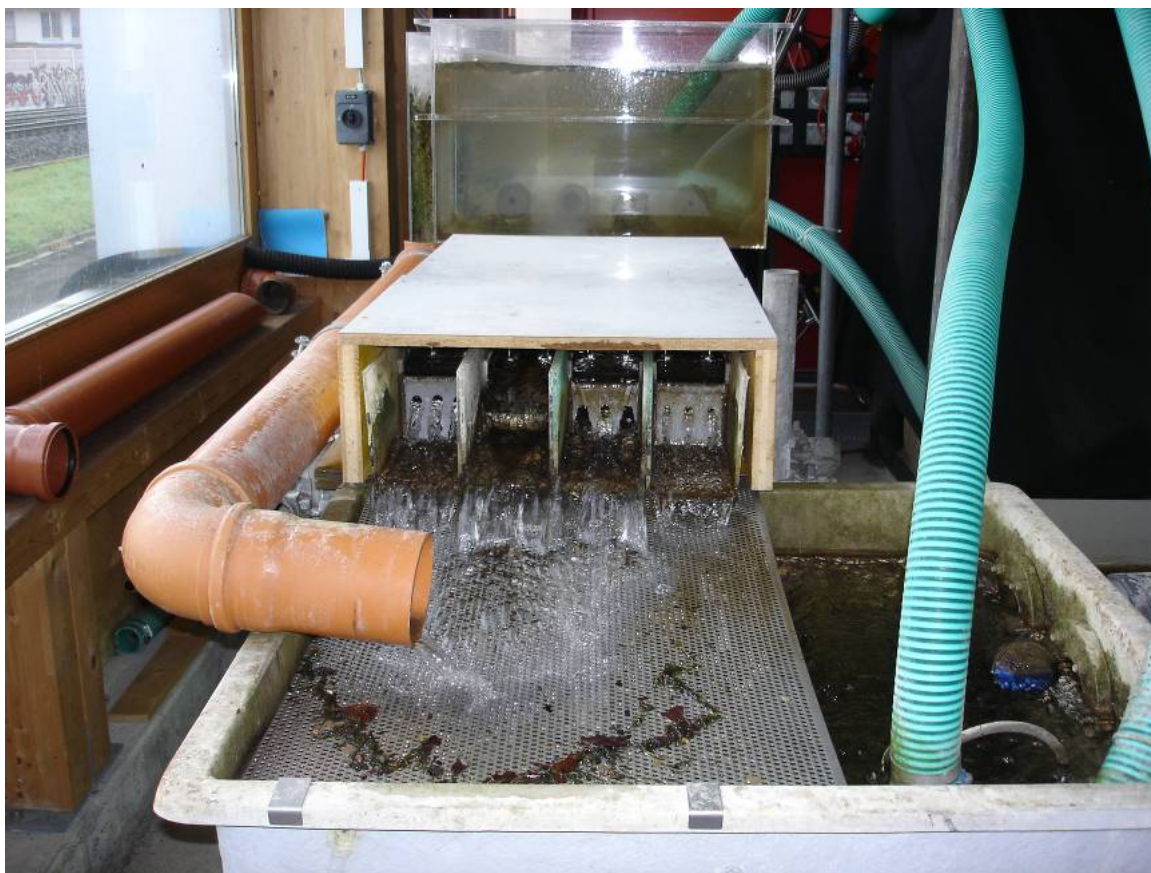

Photo 1 shows the channel system used for river water. During experiments, the channels are covered to prevent the growth of algae and limit photo degradation. A stainless steel mesh covers the collection basin to prevent the creation of air bubbles. The other function of the mesh is that it sieves out larger bits of debris (e.g. leaves).

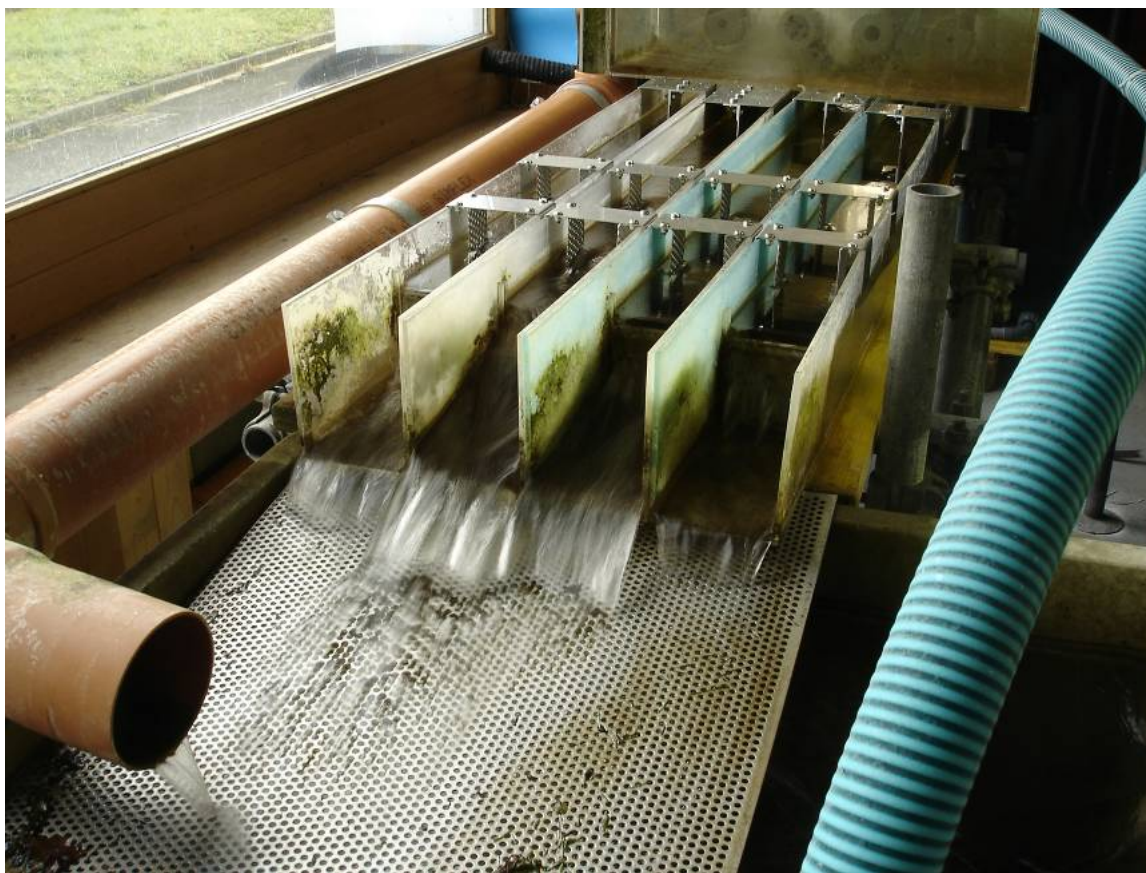

Photo 2 shows the same situation as before (Photo 1), with the cover removed.

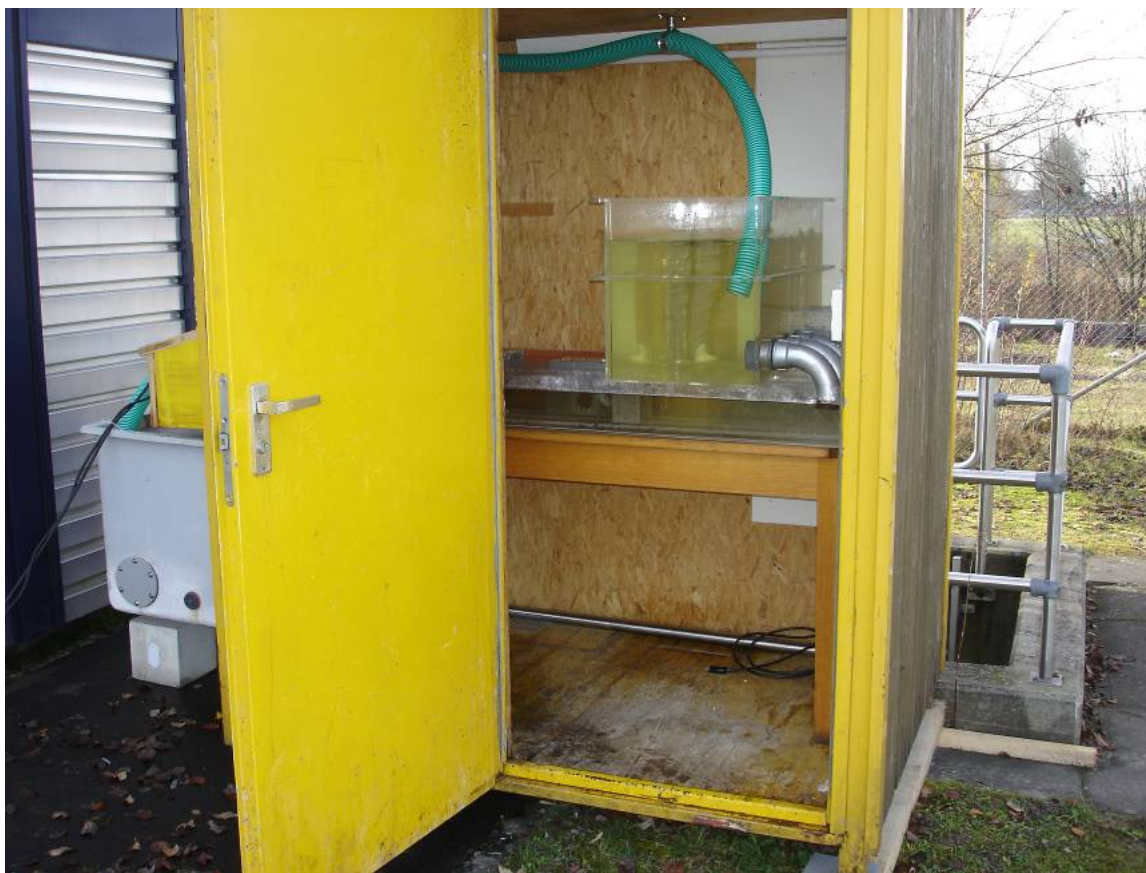

Photo 3 shows the second channel system and its location at the sewage treatment plant Wüeri, Regensdorf, Switzerland.



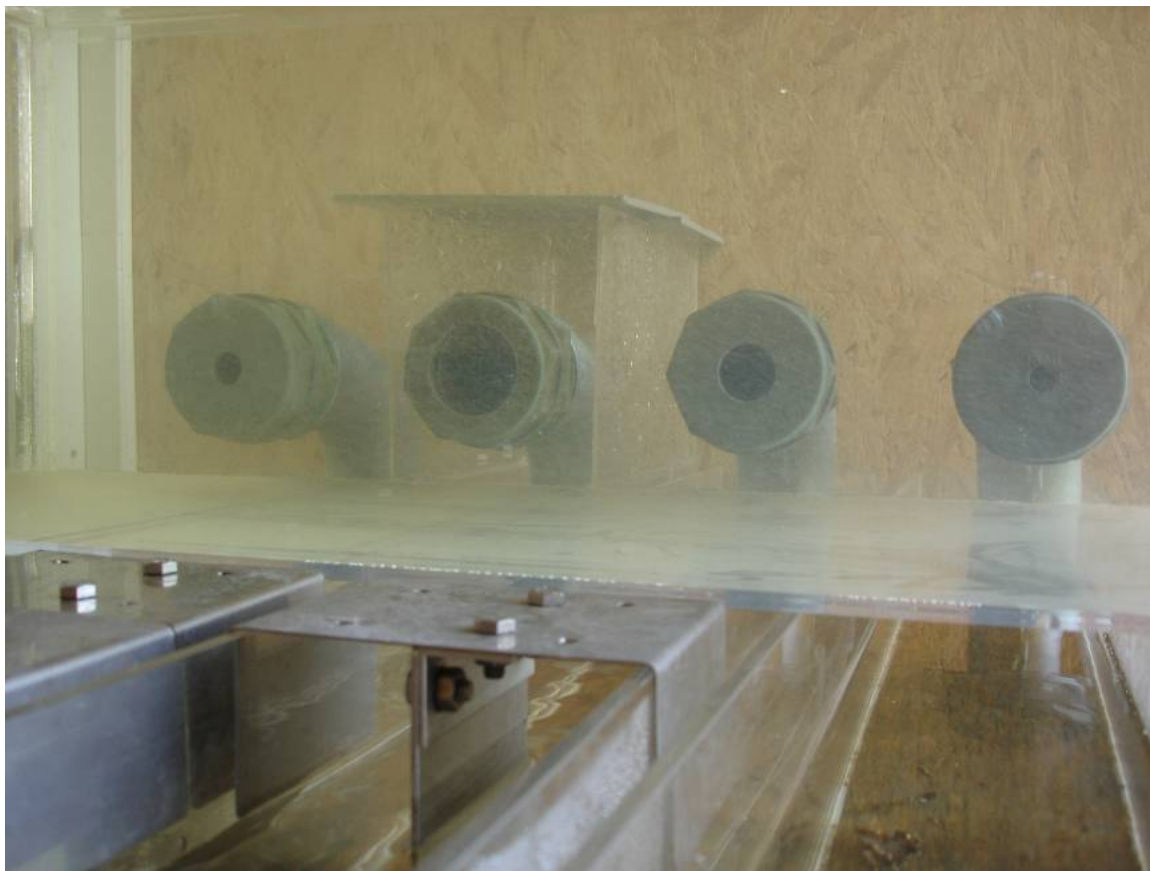

Photo 4 shows a dispenser tank with PVC caps on the stainless steel vents.

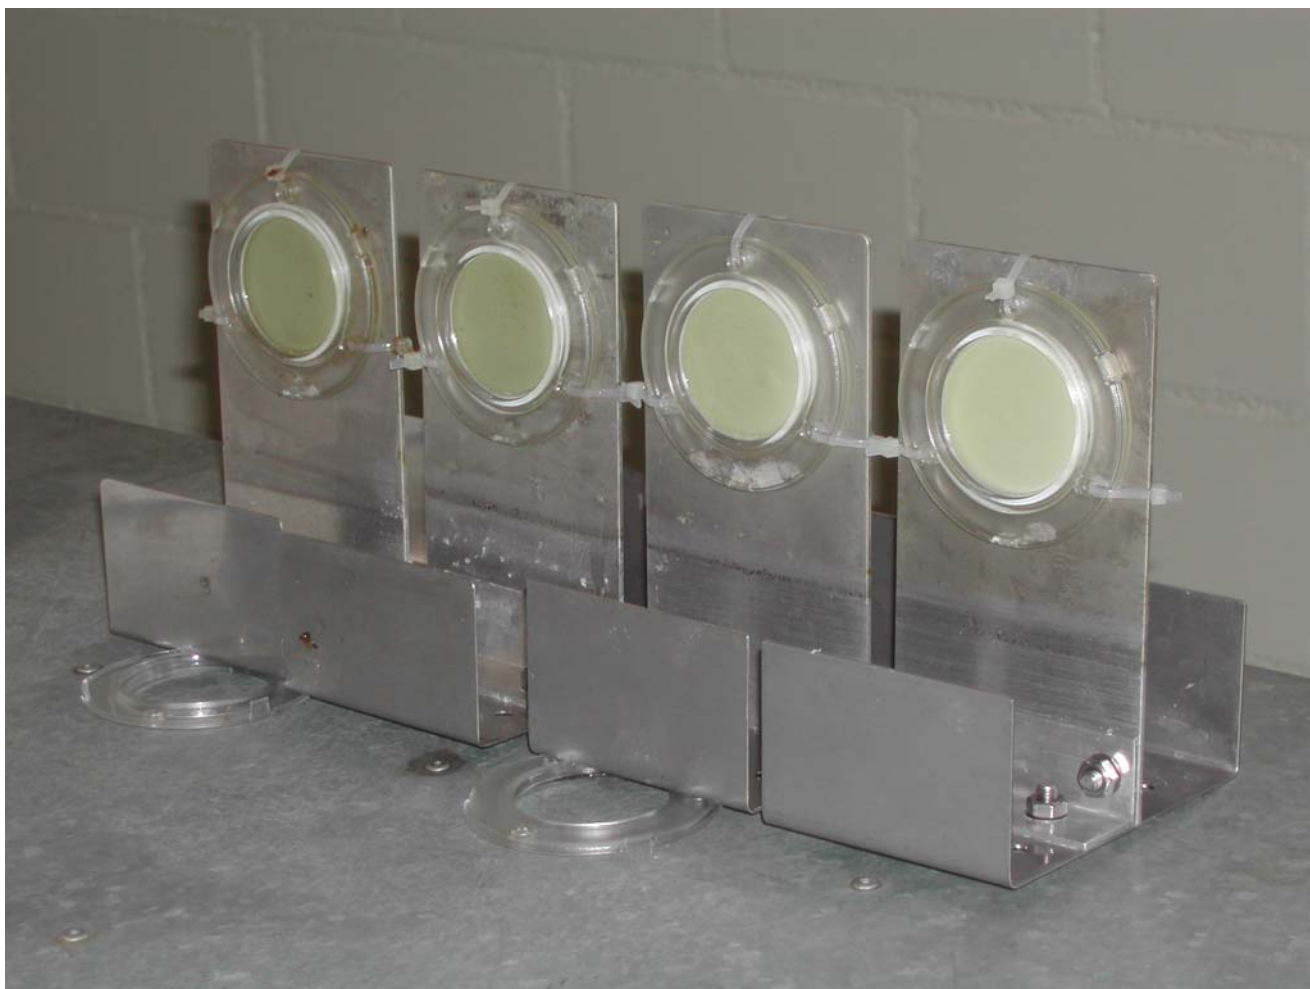

Photo 5 shows a set of SDB disks that had been exposed to treated sewage effluent for five days (note the absence of biofouling).

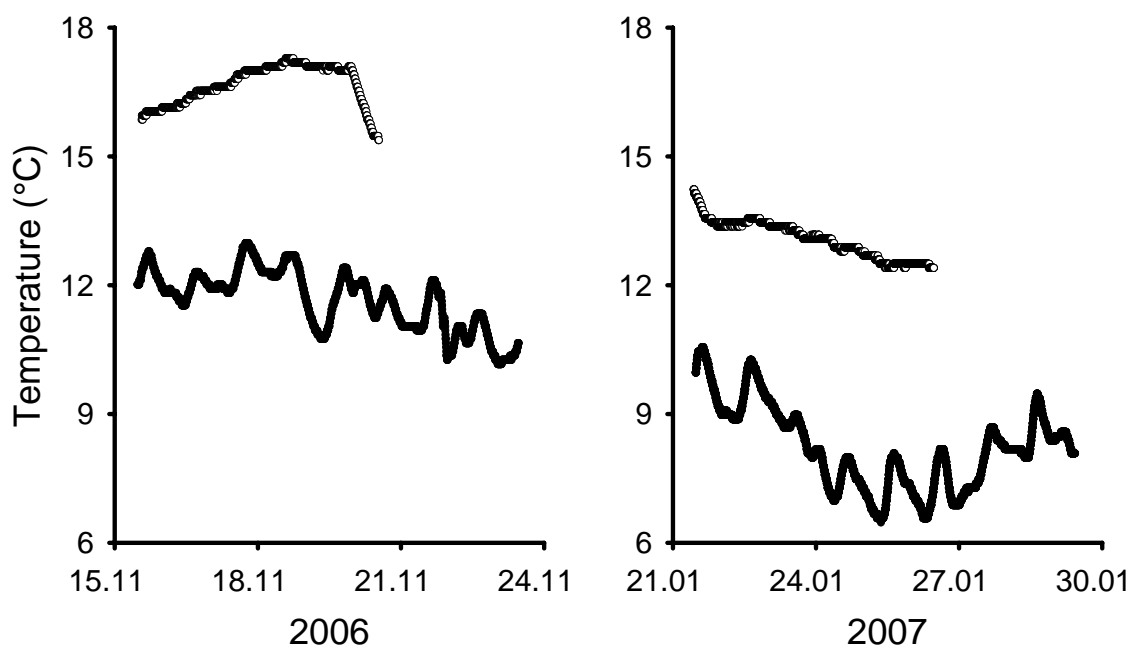

Figure 1. Temperature profiles of treated sewage effluent (open circles) and river water (closed circles) during two passive sampling trials.
